# Supplementary material
Source: publisher site journal article supplement (https://www.dovepress.com/article/416843)
Supplement: Supplementary file 1 [file get_supplementary_file.php]

# Supplementary File 1: Interview Schedule for women with breast cancer

## Research Title:

**Barriers and facilitators of adherence to oral anticancer medications among women with breast cancer: A qualitative study**

## Section A: Socio-demographic and Clinical Background Data Collection Form

**Age (years):** \_\_\_\_\_ years old

**Ethnicity/Tribe:**  Ibo  Yoruba  Hausa  Other (Please specify) \_\_\_\_\_

### Current household income/month (Naira):

Less than N20, 000  N21,000 - N50,000  N51,000 - N100,000  
 N101, 000 – N150, 000  N151, 000 –N200, 000  More than N200, 000

**Religion:**  Christianity  Islam  Other (Please specify) \_\_\_\_\_

**Highest level of education you have completed:**  None  Primary school  Secondary school  Diploma  University or higher

**Current marital status:**  Single  Married  Separated  Divorced  Widowed

**Current employment:**  Unemployed  Housewife  Student  Self-employed  
 Retired  Other (Please specify) \_\_\_\_\_

**Area of residence:**  Urban area (please specify) \_\_\_\_\_  Rural area (please specify) \_\_\_\_\_

**Do you take alcohol?**  Yes  No

**Do you smoke cigarettes:**  Yes  No

**When were you first diagnosed with breast cancer?** Month \_\_\_\_\_ Year \_\_\_\_\_

### When were you first prescribed with oral anticancer medication(s)?

Month \_\_\_\_\_ Year \_\_\_\_\_

### What are the name and dose of the oral anticancer medication(s) that you currently take?

(e.g.: Tab. Capecitabine [500mg twice a day]) -Information to be obtained from patient's medical record

---

---

---

**What other (co-morbid) medical illnesses do you have for which you take medication?**  
 (e.g.: Asthma, Hypertension, Diabetes, etc.)- *Information to be obtained from patient's medical record*

---



---



---

**What other medication do you take apart from your oral anticancer agents?**  
 Please state medication's name and dosage taken. (e.g.: Tab. Lisinopril 5mg for hypertension)  
 - *Information to be obtained from patient's medical record*

---



---



---



---

**Section B: Interview Questions on OAM barriers and facilitators**

|                                                  |                                                                                                                                                                                                                                                                                                                                                                                                                                                                                                                                                                                         |
|--------------------------------------------------|-----------------------------------------------------------------------------------------------------------------------------------------------------------------------------------------------------------------------------------------------------------------------------------------------------------------------------------------------------------------------------------------------------------------------------------------------------------------------------------------------------------------------------------------------------------------------------------------|
| <b>Background</b>                                |                                                                                                                                                                                                                                                                                                                                                                                                                                                                                                                                                                                         |
| 1) Breast cancer duration                        | How long have you had breast cancer? ( <i>.....months/years</i> )                                                                                                                                                                                                                                                                                                                                                                                                                                                                                                                       |
| 2) Oral anticancer medication duration           | I understand that you are taking oral anticancer medication for your breast cancer. Am I right? How long have you been taking it? ( <i>.....months/years</i> )                                                                                                                                                                                                                                                                                                                                                                                                                          |
| <b>Medications and Adherence</b>                 |                                                                                                                                                                                                                                                                                                                                                                                                                                                                                                                                                                                         |
| 1) How it started                                | How do you take your oral anticancer medication at home?                                                                                                                                                                                                                                                                                                                                                                                                                                                                                                                                |
| <i>Probe</i>                                     | <i>Is anyone assisting you take your medication? (family / friends / care giver?)</i>                                                                                                                                                                                                                                                                                                                                                                                                                                                                                                   |
|                                                  | <i>How are they helping?</i>                                                                                                                                                                                                                                                                                                                                                                                                                                                                                                                                                            |
| 2) Influencing factors (barriers & facilitators) | <p>What difficulties/problems do you face when taking your oral anticancer medication as prescribed by your doctor?</p> <p><i>Can you recall a time when you didn't take your medication for several days?</i></p> <p><i>What happened that prevented you from taking your medications?</i></p> <p><i>Do you ever have trouble remembering to take your medications? Why/Why not?</i></p> <p><i>Do you ever have trouble remembering to refill your medications? Why/Why not?</i></p> <p><i>Do you experience any side effects that make you not want to take your medications?</i></p> |

|                                                         |                                                                                                                                                                                                                                                                                                                                                                                                                                                                                                                                                                                                                                                                                                                                                                                                                                                                                                              |
|---------------------------------------------------------|--------------------------------------------------------------------------------------------------------------------------------------------------------------------------------------------------------------------------------------------------------------------------------------------------------------------------------------------------------------------------------------------------------------------------------------------------------------------------------------------------------------------------------------------------------------------------------------------------------------------------------------------------------------------------------------------------------------------------------------------------------------------------------------------------------------------------------------------------------------------------------------------------------------|
| <p><i>Probe</i></p>                                     | <p>Do you have any situations/factors that make it hard for you to take your oral anticancer medication as prescribed by your doctor? <i>(if yes, can you describe the situation?)</i></p> <p><i>What are the things that the hospital does that make it hard for you to take the medications you need to manage your breast cancer?</i></p> <p><i>Can you talk about a specific time you had that problem? When did it happen? What were the exact circumstances?</i></p> <p><i>Have you ever found it difficult to (again, ask for specific stories)</i></p> <p><i>Get questions about your medications answered?</i></p> <p><i>Communicate with your physicians about changes in your prescriptions?</i></p> <p><i>Get your medications from the pharmacy without having to wait too long?</i></p> <p><i>Do you have health insurance (e.g. NHIS)?</i></p> <p><i>Do you Pay for your medications?</i></p> |
| <p><i>Probe</i></p>                                     | <p>What situations/factors make it easy for you to take your oral anticancer medication as prescribed by your doctor?</p> <p><i>What are the things the hospital currently does that make it easier to take your medications?</i></p> <p><i>Are there things the pharmacy does that make it easier for you to order or pick up your medications?</i></p> <p><i>Are there things that the pharmacy or your physician does to help you understand the medications you are taking?</i></p> <p><i>Are there any other services you have encountered at the hospital that have helped you take your medication?</i></p> <p><i>What other things could the hospital do to help you take your medications?</i></p> <p><i>What are some changes the hospital could make that would most help you take your medications?</i></p>                                                                                      |
| <p>3) Perception/view on oral anticancer medication</p> | <p>How do you feel about your oral anticancer medication?</p> <p>Do you plan to change the way you take your oral anticancer medication? (If yes, how and why?)</p>                                                                                                                                                                                                                                                                                                                                                                                                                                                                                                                                                                                                                                                                                                                                          |
| <p>4) Needs</p>                                         | <p>What are your concerns about your oral anticancer medication? What do you think could be done to help you take your medication? (Patient's point of view)</p> <p>What can your family members do to help you?</p>                                                                                                                                                                                                                                                                                                                                                                                                                                                                                                                                                                                                                                                                                         |

|                                |                                                                                                                                                     |
|--------------------------------|-----------------------------------------------------------------------------------------------------------------------------------------------------|
| <i>Probe</i>                   | What can you do yourself to help you take your oral anticancer medication?                                                                          |
|                                | How can healthcare providers (Doctors/Pharmacists/Nurses) assist you to take your oral medication for breast cancer?                                |
|                                | What are the ways that can help you take your oral anticancer medication as prescribed by the doctor?                                               |
| <i>Probe</i>                   | What helps you remember to take your oral anticancer medication?                                                                                    |
| <b>Beliefs and Experiences</b> |                                                                                                                                                     |
| 1) Illness                     | Do you have any religious or cultural beliefs which might influence the way you feel about your breast cancer? (If yes, how & why? /If no, why no?) |
|                                | How do your family and friends/co-worker feel about your breast cancer?                                                                             |
| 2) Medication/treatment        | Do you seek any spiritual or religious help for your breast cancer?<br>(if yes, how & why? If no, why no?)                                          |
|                                | Have you ever stopped taking your oral anticancer medication because of your religious or cultural beliefs? (If yes, how & why? / If no, why no?)   |
|                                | Have you ever used/are you currently using herbal/traditional medicines for your breast cancer? (If yes, what & why?)                               |
| <b>Wrap Up</b>                 |                                                                                                                                                     |
|                                | Do you have anything else to share regarding your breast cancer or your oral anticancer medication?                                                 |
|                                | Is there anything that you will like to ask me?                                                                                                     |
|                                | How did you feel about this interview?                                                                                                              |

NHIS: National Health Insurance Scheme

< END OF INTERVIEW >
